# Supplementary material
Source: PubMed Central journal article supplement (PMC4261982)
Supplement: bm501467h_si_001.pdf [file bm501467h_si_001.pdf]

**Efficient targeting of fatty-acid modified oligonucleotides to live cell membranes through step-wise assembly**

*Robert J. Weber, Samantha I. Liang, Nicholas S. Selden, Tejal A. Desai and Zev J. Gartner*

*Department of Pharmaceutical Chemistry, University of California, San Francisco, 600 16th St. Box 2280, San Francisco, CA 94158*

## Contents

|                                                                                                         |        |
|---------------------------------------------------------------------------------------------------------|--------|
| Step-wise Assembly of Membrane Anchored DNA-Duplexes For The Chemical Control of Cellular Adhesion..... | S1     |
| Contents.....                                                                                           | S2     |
| Oligonucleotide Sequences.....                                                                          | S3     |
| MALDI Data.....                                                                                         | S4     |
| MALDI Traces .....                                                                                      | S5-S12 |
| Figure S1 Labeling with Single and Double Cholesterol Anchors.....                                      | S13    |
| Figure S2 Cell Labeling Optimization.....                                                               | S14    |
| Figure S3 Cell-Cell and Cell-Surface Binding.....                                                       | S15    |
| Figure S4 Lifetime As A Function of Lipid Lipophilicity.....                                            | S16    |
| Figure S5 DLS Particle Size Data.....                                                                   | S17    |
| Figure S6 Labeling of Primary Cell Lines.....                                                           | S18    |
| References.....                                                                                         | S19    |

## Oligonucleotide Sequences:

### Anchor Strands:

- 1) CAGT Repeat, 10 bp Duplex: Y-5' Amino-AG CTG TCA CT(T)<sub>70</sub> CAG TCA GTC AGT CAG TCA GT 3'
- 2) CAGT Repeat, 15 bp Duplex: Y-5' Amino-G ATC CAG CTG TCA CT(T)<sub>65</sub> CAG TCA GTC AGT CAG TCA GT 3'
- 3) CAGT Repeat, 20 bp Duplex: Y-5'-Amino-GTA ACG ATC CAG CTG TCA CT(T)<sub>x</sub> CAG TCA GTC AGT CAG TCA GT 3'
- 4) ACTG Repeat, 20 bp Duplex: Y-5'-Amino-GTA ACG ATC CAG CTG TCA CT(T)<sub>60</sub> ACT GAC TGA CTG ACT GAC TG 3'
- 5) CAGT Repeat, 20 bp Duplex: 5'-Cholesterol Phosphoramidite-GTA ACG ATC CAG CTG TCA C(T)<sub>60</sub>C AGT CAG TCA GTC AGT CAG T 3'

X=0, 20, 40, 60, or 80; Y= C<sub>16</sub>, C<sub>18</sub>, C<sub>20</sub>, C<sub>22</sub>, C<sub>24</sub> saturated fatty acid

### Co-Anchor Strands:

- 1) 10 bp Co-Anchor: 5' AGT GAC AGC T Amino 3'-Y
  - 2) 15 bp Co-Anchor: 5' AGT GAC AGC TGG ATC Amino 3'-Y
  - 3) 20 bp Co-Anchor: 5' AGT GAC AGC TGG ATC GTT AC Amino 3'-Y
  - 4) 30 bp Co-Anchor: 5' T<sub>10</sub> AGT GAC AGC TGG ATC GTT AC Amino 3'-Y
  - 5) 40 bp Co-Anchor: 5' T<sub>20</sub> AGT GAC AGC TGG ATC GTT AC Amino 3'-Y
  - 6) 50 bp Co-Anchor: 5' T<sub>30</sub> AGT GAC AGC TGG ATC GTT AC Amino 3'-Y
- Y=C<sub>16</sub>  
Y=C<sub>16</sub>  
Y=C<sub>16</sub>, C<sub>18</sub>, C<sub>20</sub>, C<sub>22</sub>, C<sub>24</sub> saturated fatty acid, Cholesterol

### Fluorescent Strands:

FAM-5'-(CAGT)<sub>5</sub>-3'  
FAM-5'-(ACTG)<sub>5</sub>-3'

## MALDI Mass Spectroscopy Data

The mass of representative co-anchor samples was confirmed by MALDI-MS using a Voyager-DE Pro in reflector mode with a hydroxypicolinic acid/ammonium citrate matrix supplemented with acetone solubilized nitrocellulose<sup>2</sup>. While the various anchor strands and co-anchor strands were tested for purity by analytical HPLC re-injection, only the masses of the co-anchor strands were confirmed by MALDI-MS due to the low mass resolution of MALDI for high molecular weight FA-oligonucleotides. Each measurement represents an individual spot on the MALDI plate.

| Molecule             | Actual MW | Measured (M+H) |      |      |      |      | Average | StDev |
|----------------------|-----------|----------------|------|------|------|------|---------|-------|
|                      |           | 1              | 2    | 3    | 4    | 5    |         |       |
| 10mer 3' C16         | 3500      | 349            | 3499 | 3499 | 3498 | 3499 | 3499    | 0.4   |
| 15mer 3' C16         | 5065      | 5064           | 5064 | 5064 | 5064 | 5064 | 5064    | 0.0   |
| 20mer 3' C16         | 6605      | 6603           | 6607 | 6606 | 6599 | 6598 | 6603    | 4.0   |
| 20mer 3' C18         | 6633      | 6630           | 6629 | 6630 | 6630 | 6630 | 6630    | 0.6   |
| 20mer 3' C20         | 6661      | 6656           | 6657 | 6657 | 6657 | 6657 | 6657    | 0.4   |
| 20mer 3' C22         | 6689      | 6686           | 6685 | 6685 | 6685 | 6685 | 6685    | 0.4   |
| 20mer 3' C24         | 6717      | 6717           | 6715 | 6714 | 6714 | 6713 | 6715    | 1.2   |
| 20mer 3' Cholesterol | 6913      | 6912           | 6912 | 6912 | 6913 | 6911 | 6912    | 0.7   |

Voyager Spec #1[BP = 3499.2, 2038]

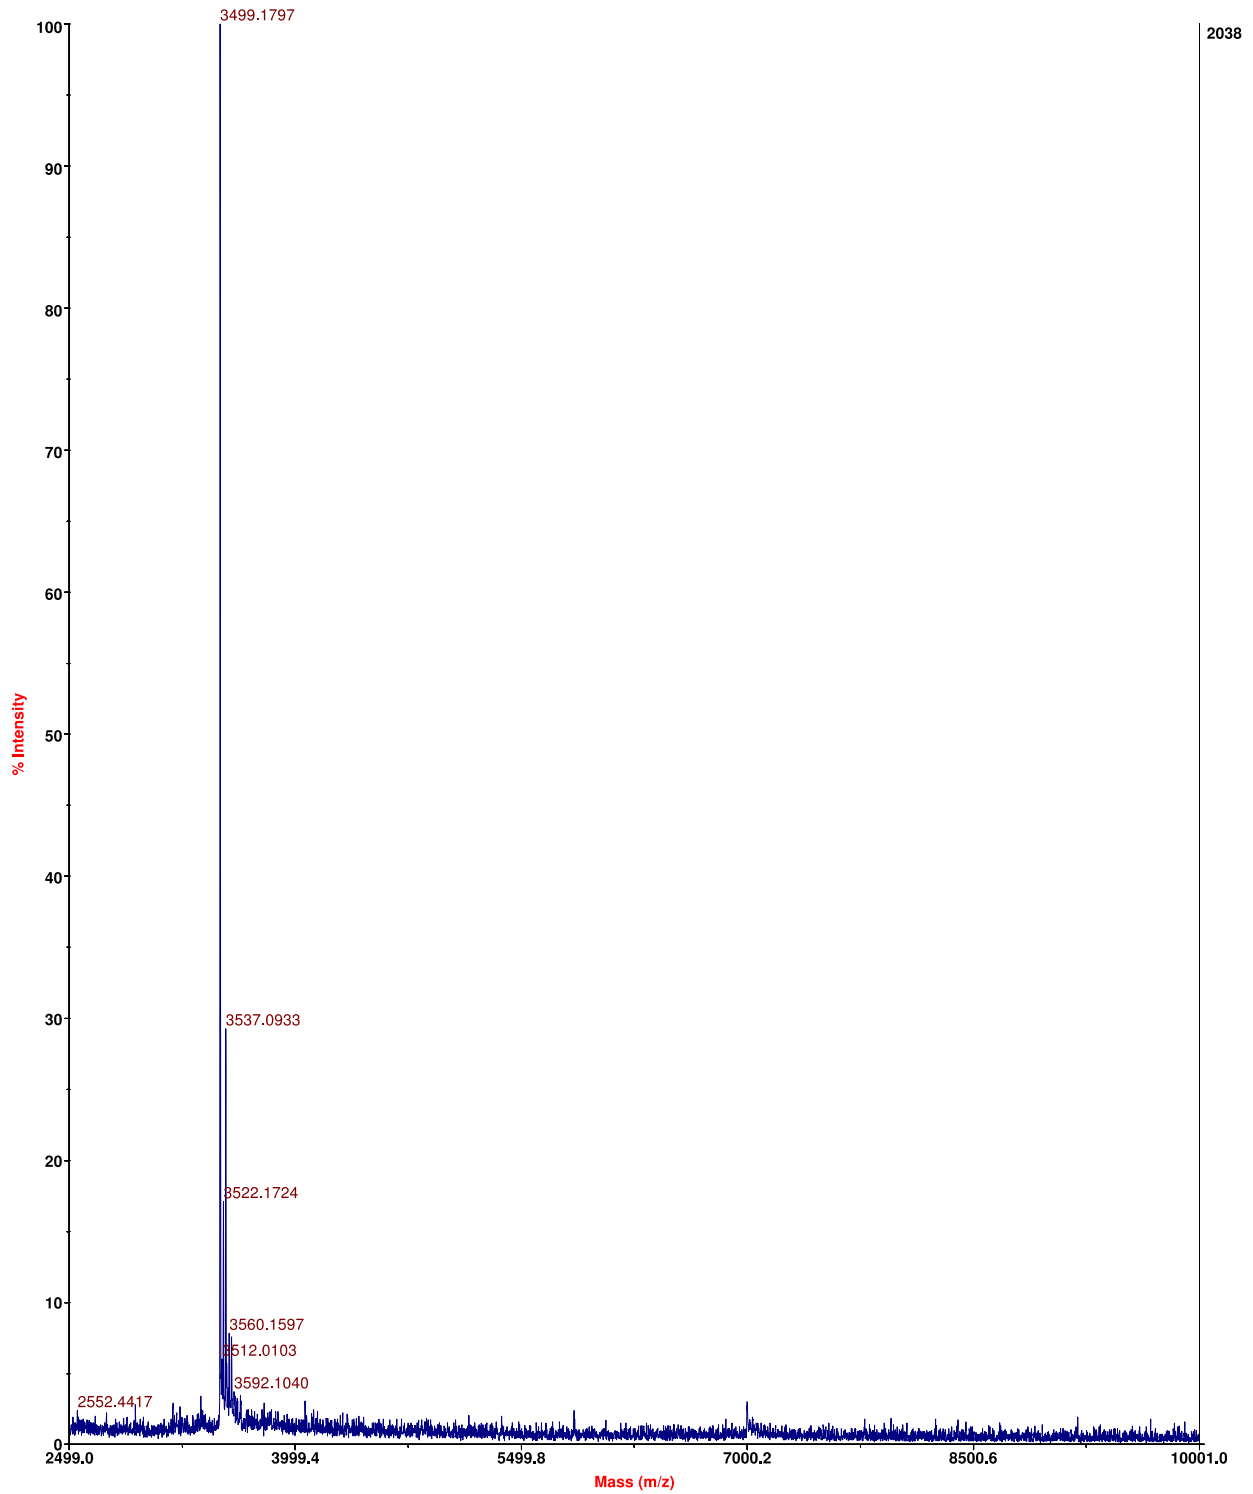

F:\...13-C16-10mer.dat  
Acquired:

Voyager Spec #1[BP = 5063.9, 1371]

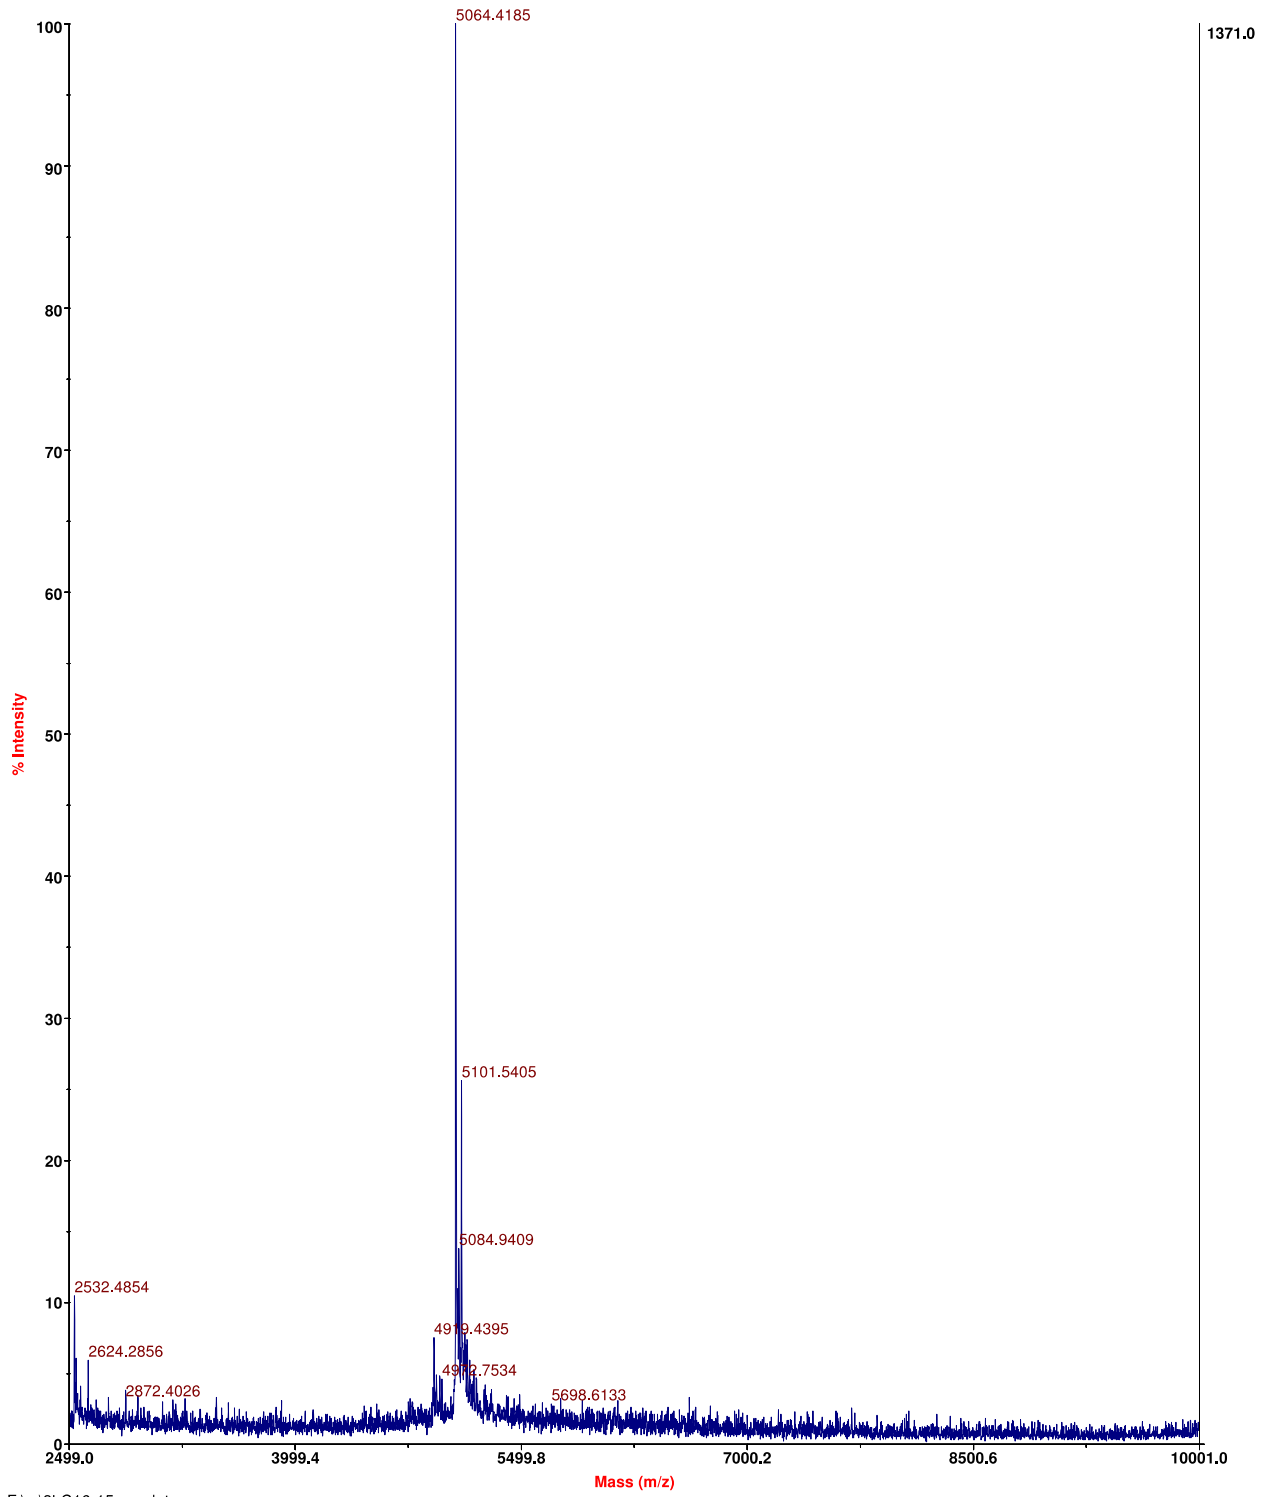

F:\...13-C16-15mer.dat  
Acquired:

Voyager Spec #1[BP = 6600.4, 301]

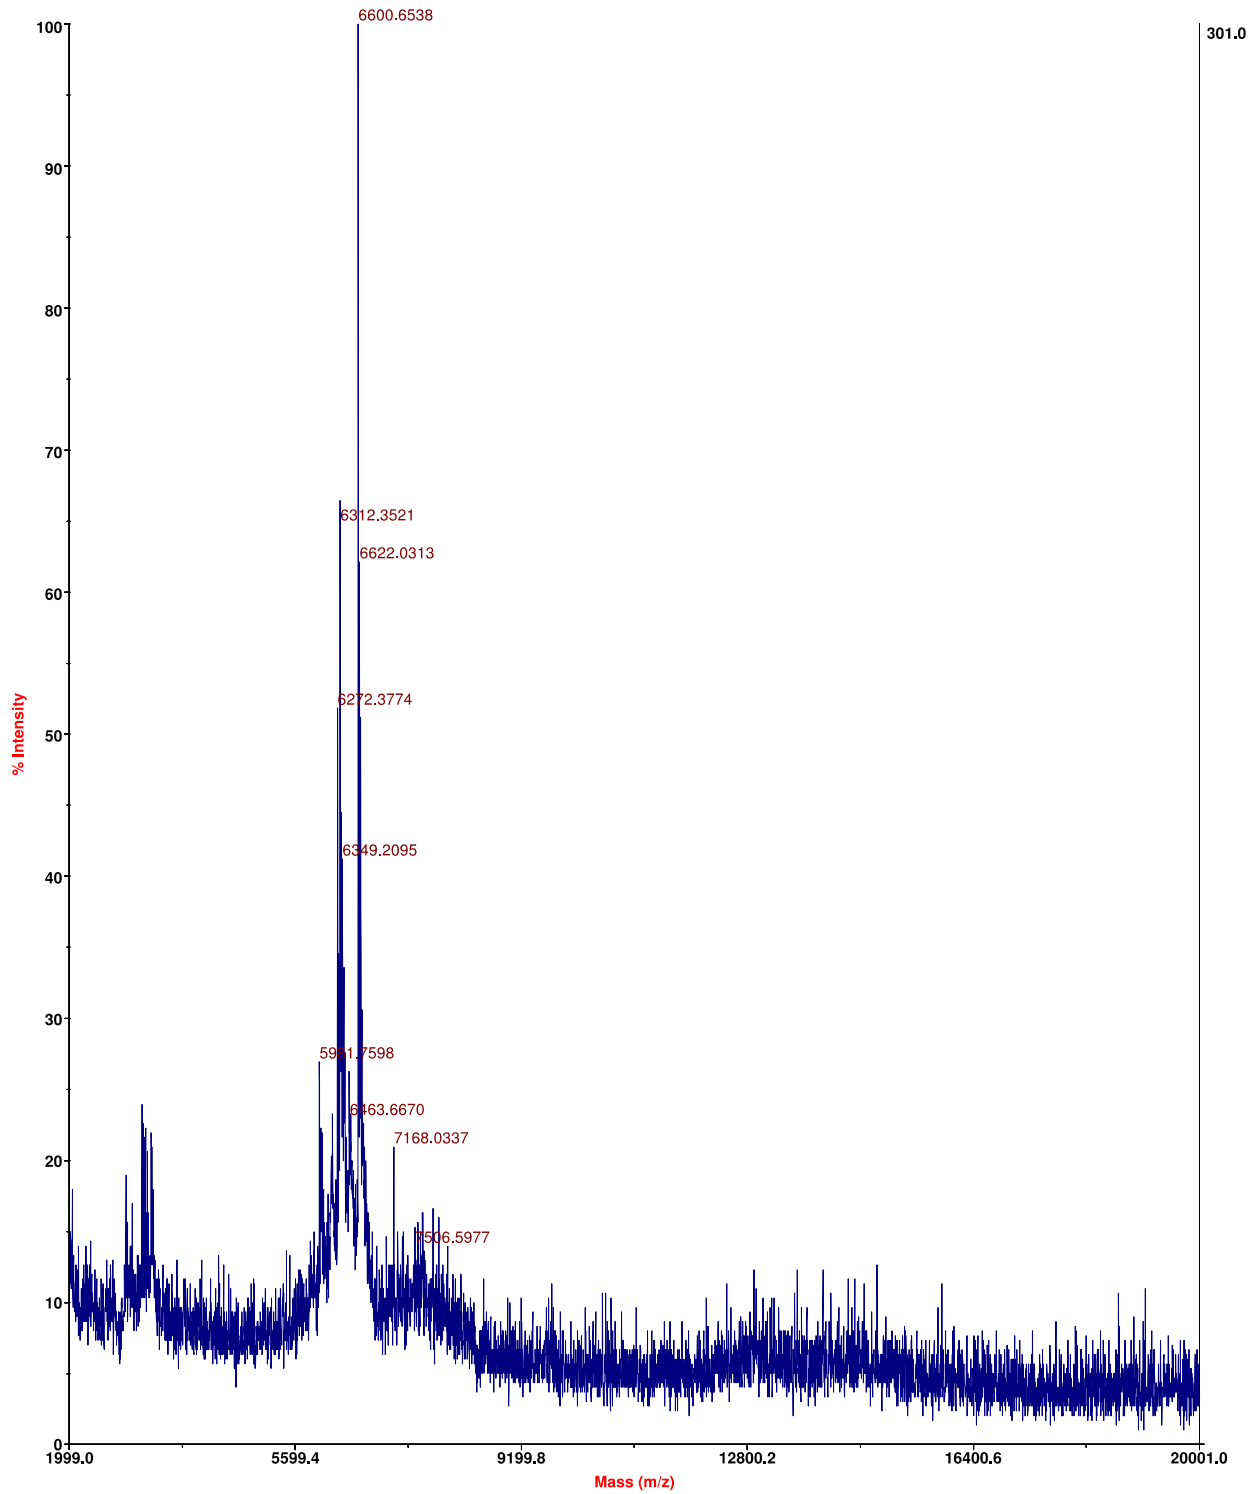

F:\...13-C16-20mer.dat  
Acquired:

Voyager Spec #1 [BP = 6629.1, 1204]

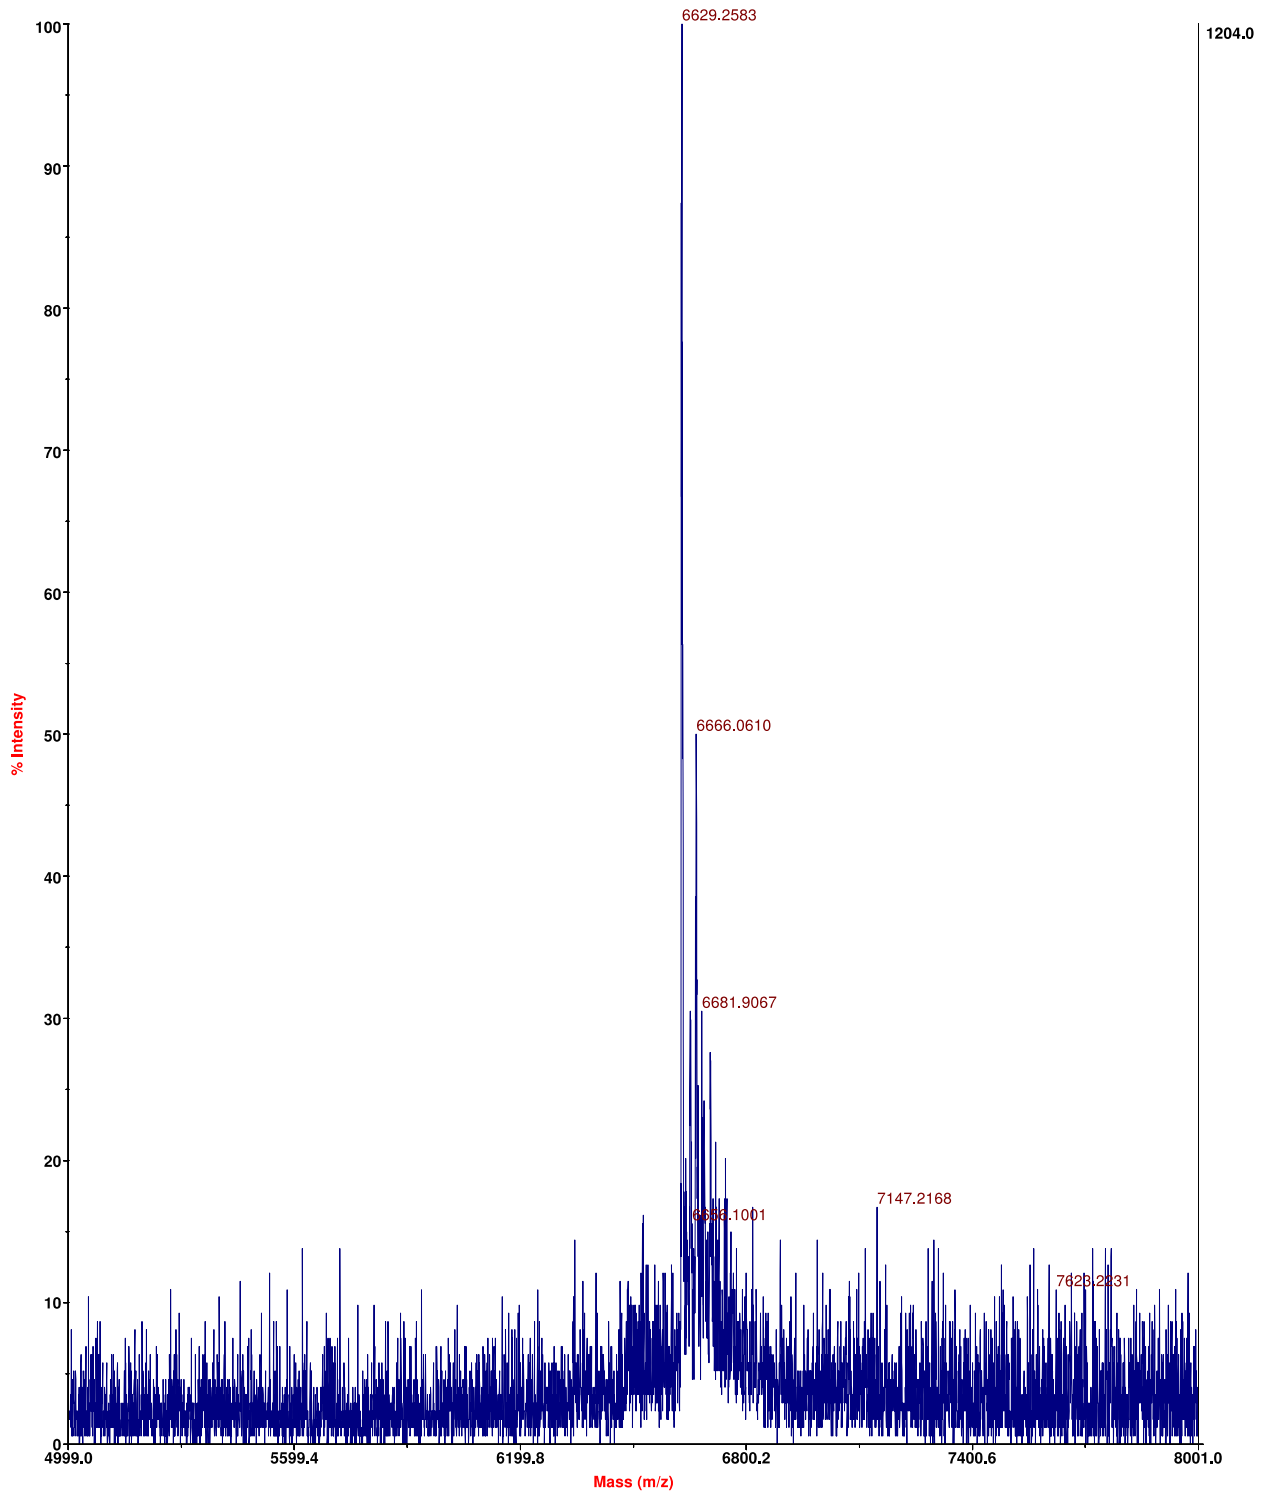

F:\...13-C18-20mer.dat  
Acquired:



Voyager Spec #1[BP = 6657.0, 444]

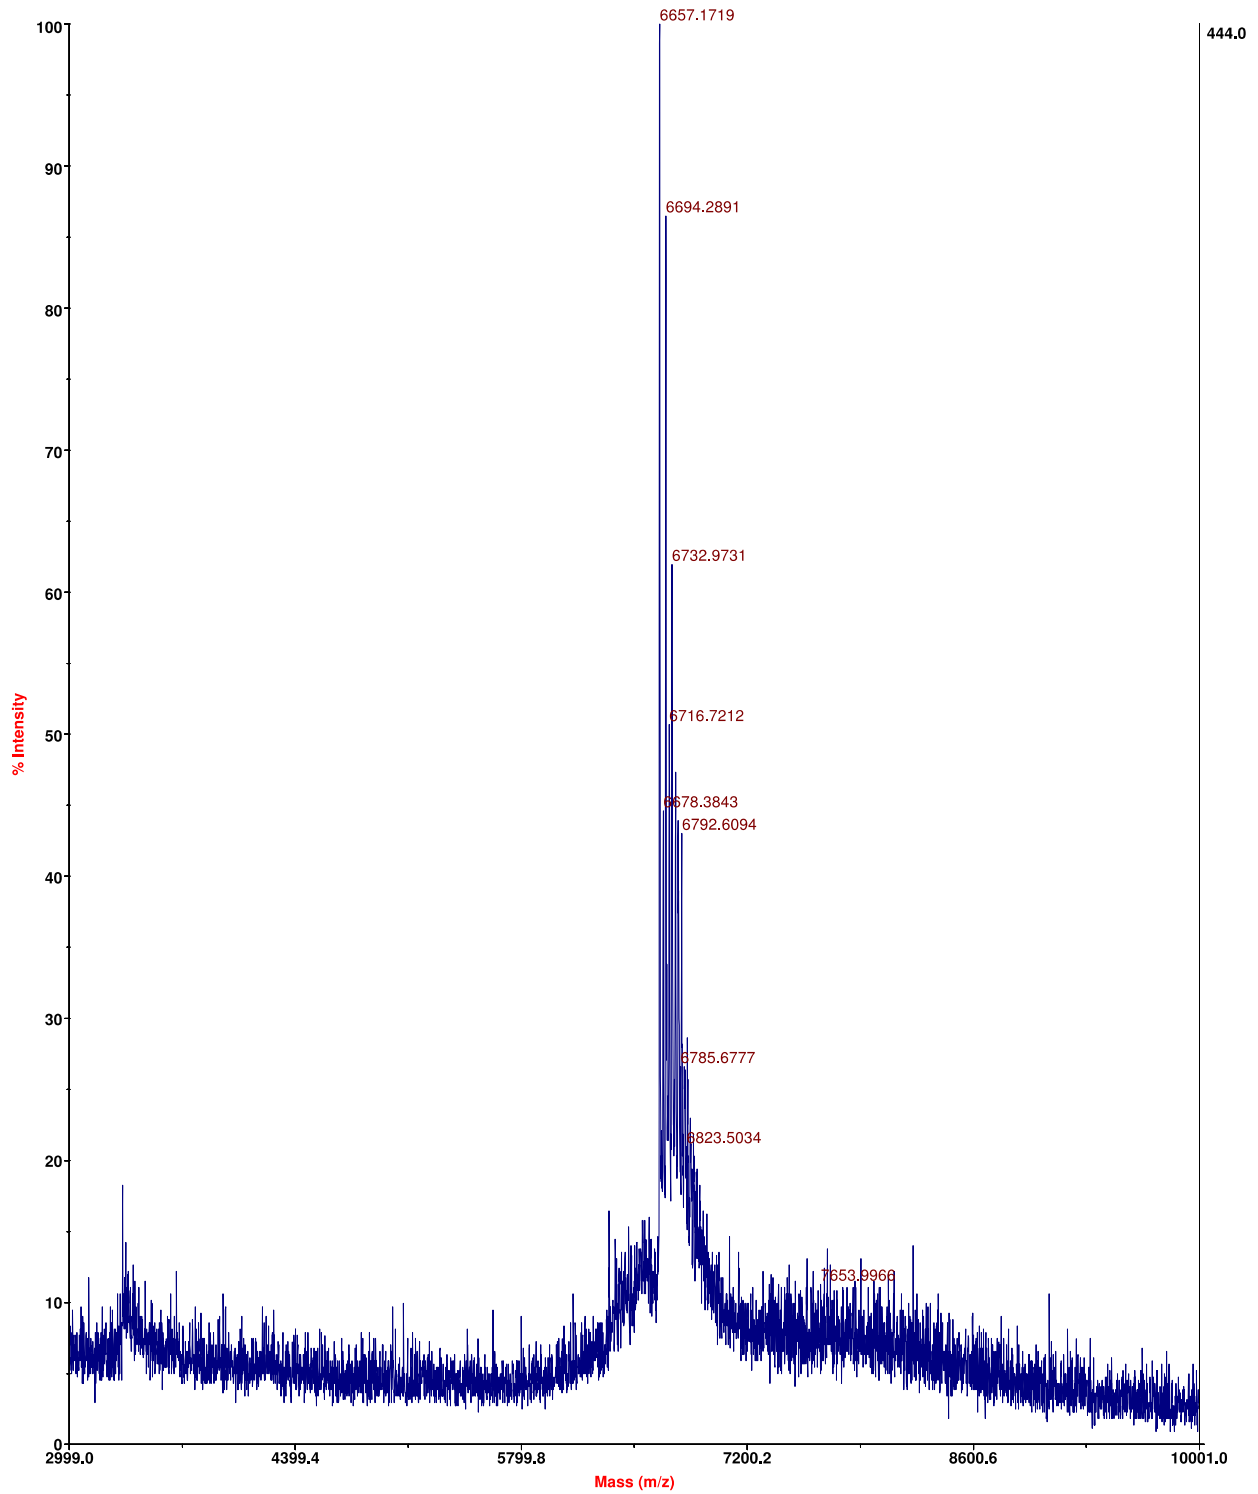

F:\...13-C20-20mer.dat  
Acquired:

Voyager Spec #1 [BP = 6684.8, 1014]

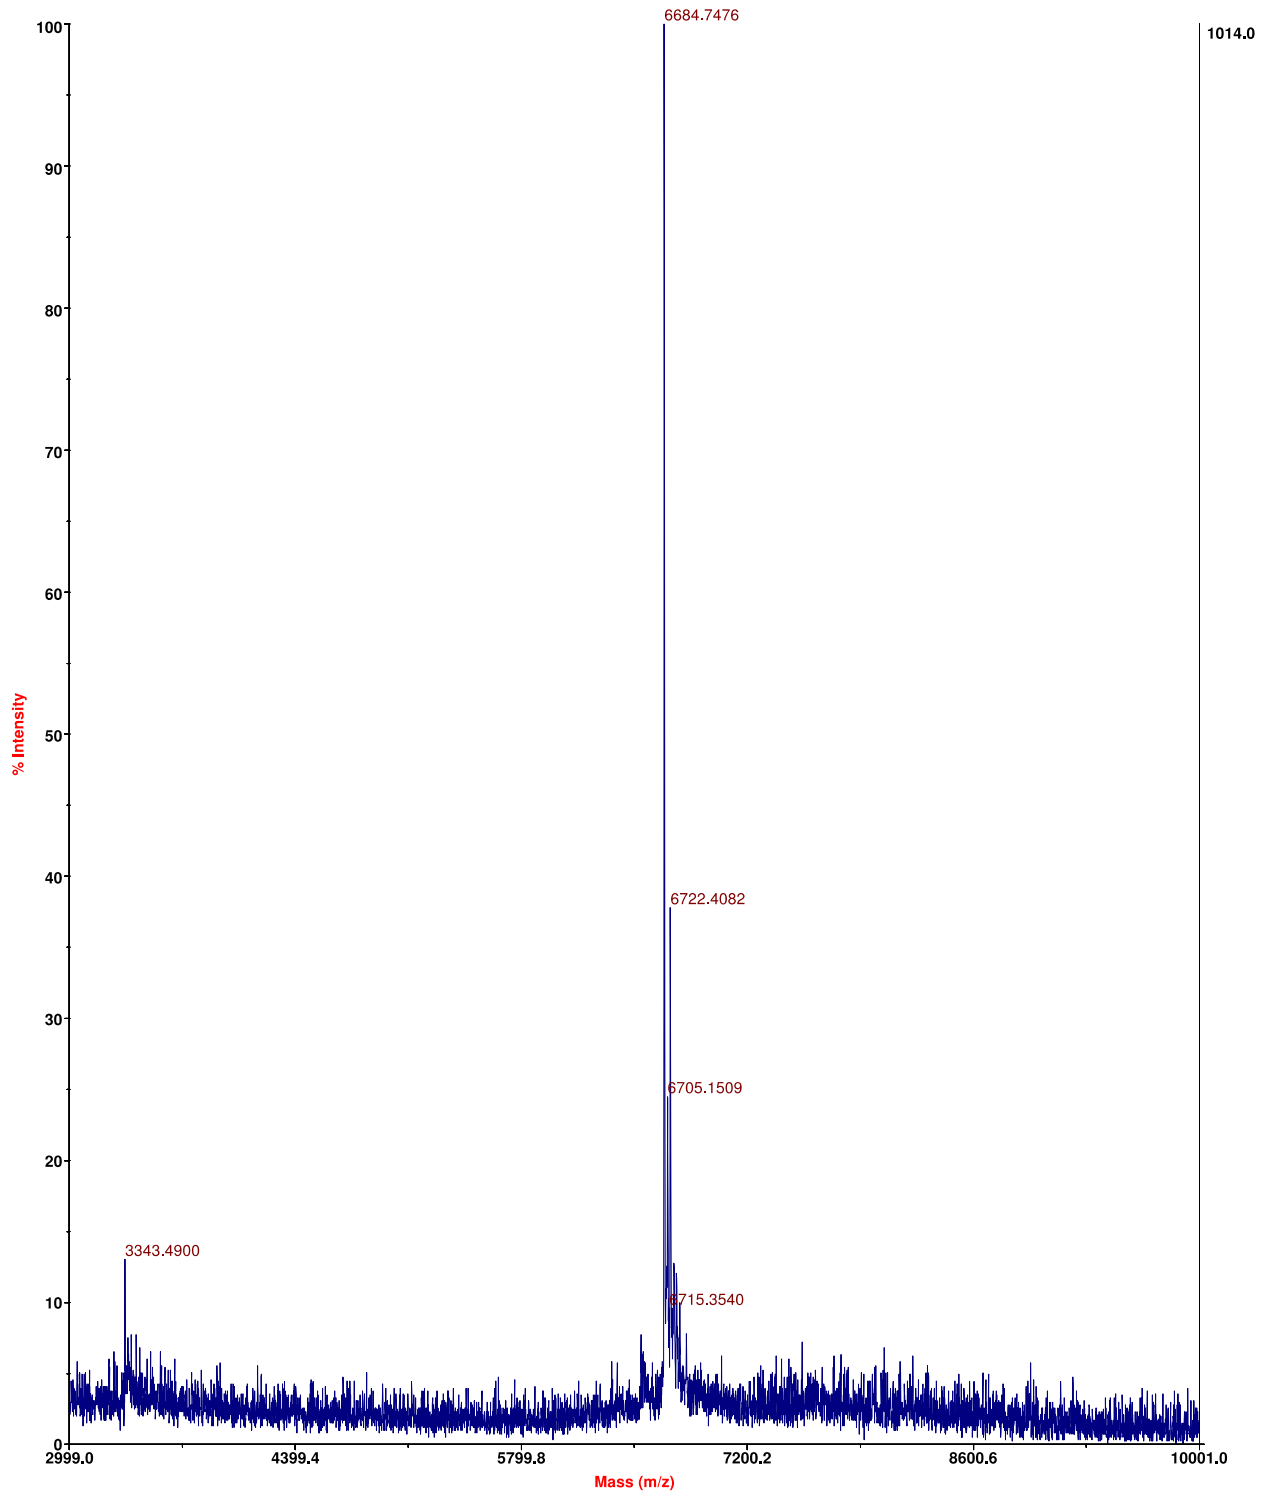

F:\...13-C22-20mer.dat  
Acquired:

Voyager Spec #1 [BP = 6713.9, 4488]

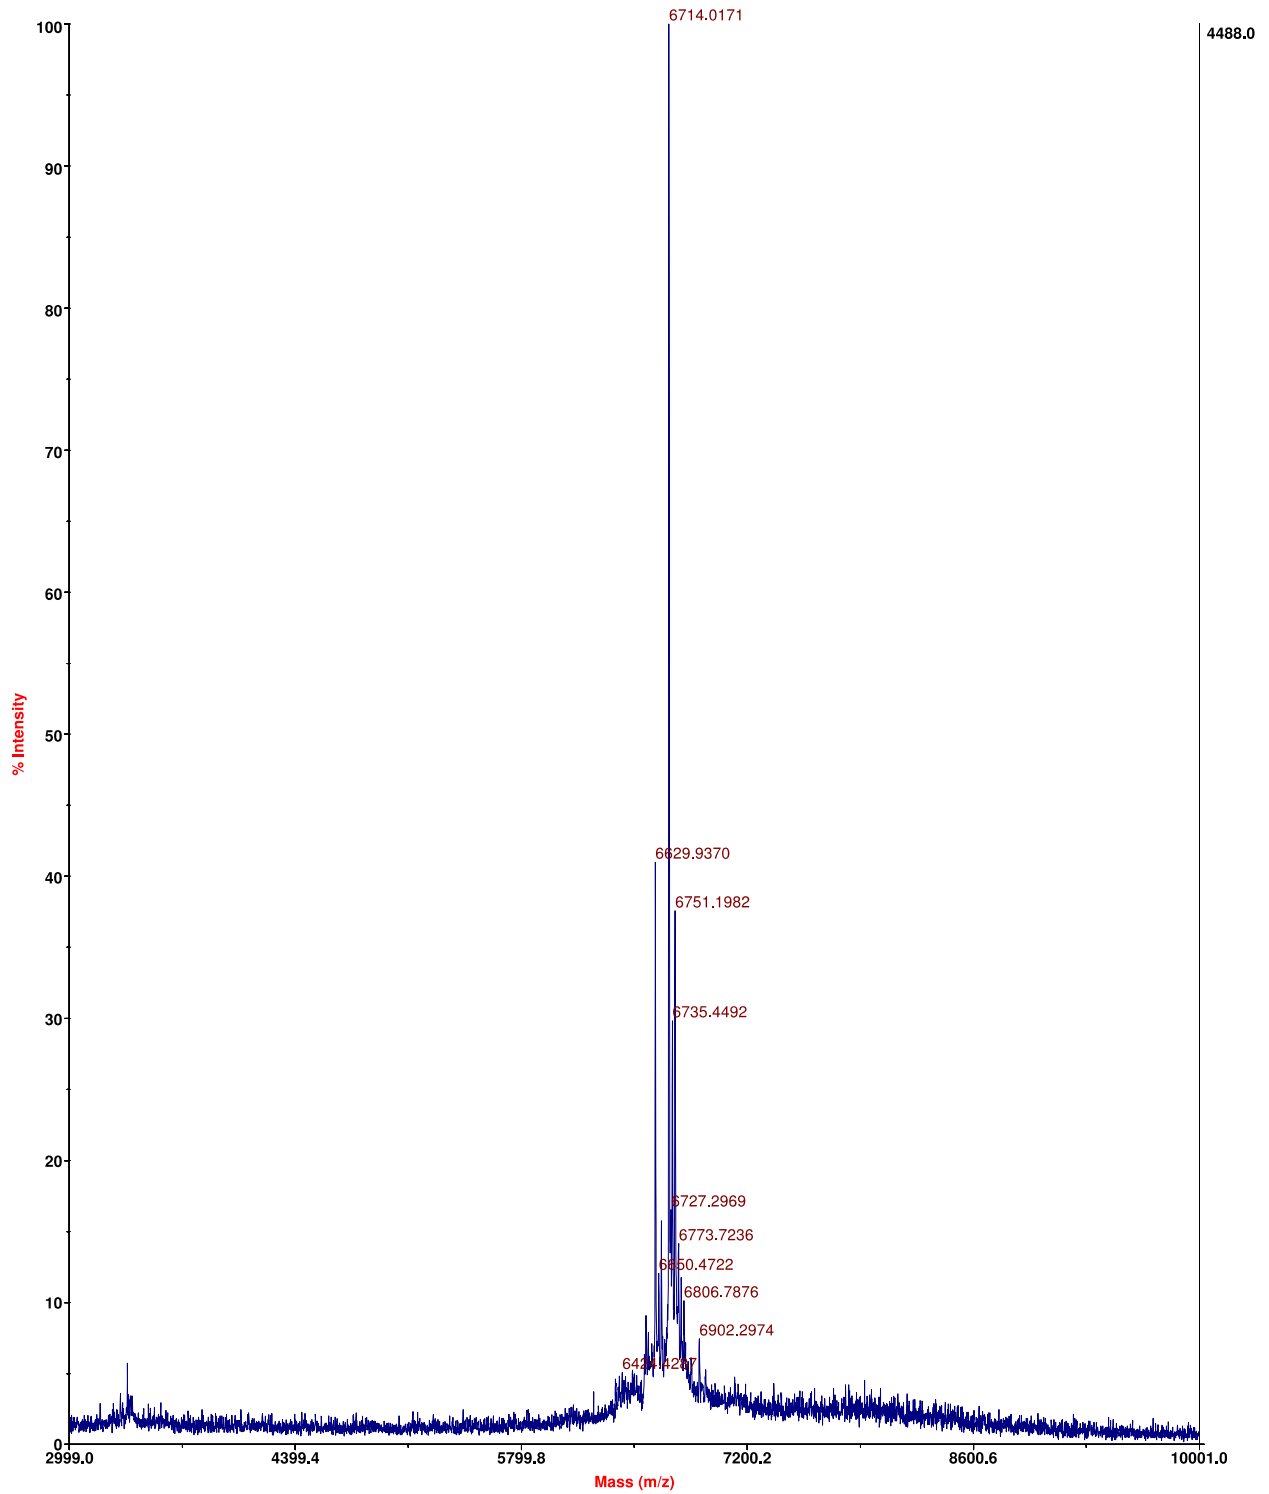

F:\...13-C24-mer.dat  
Acquired:

Voyager Spec #1[BP = 6912.5, 122]

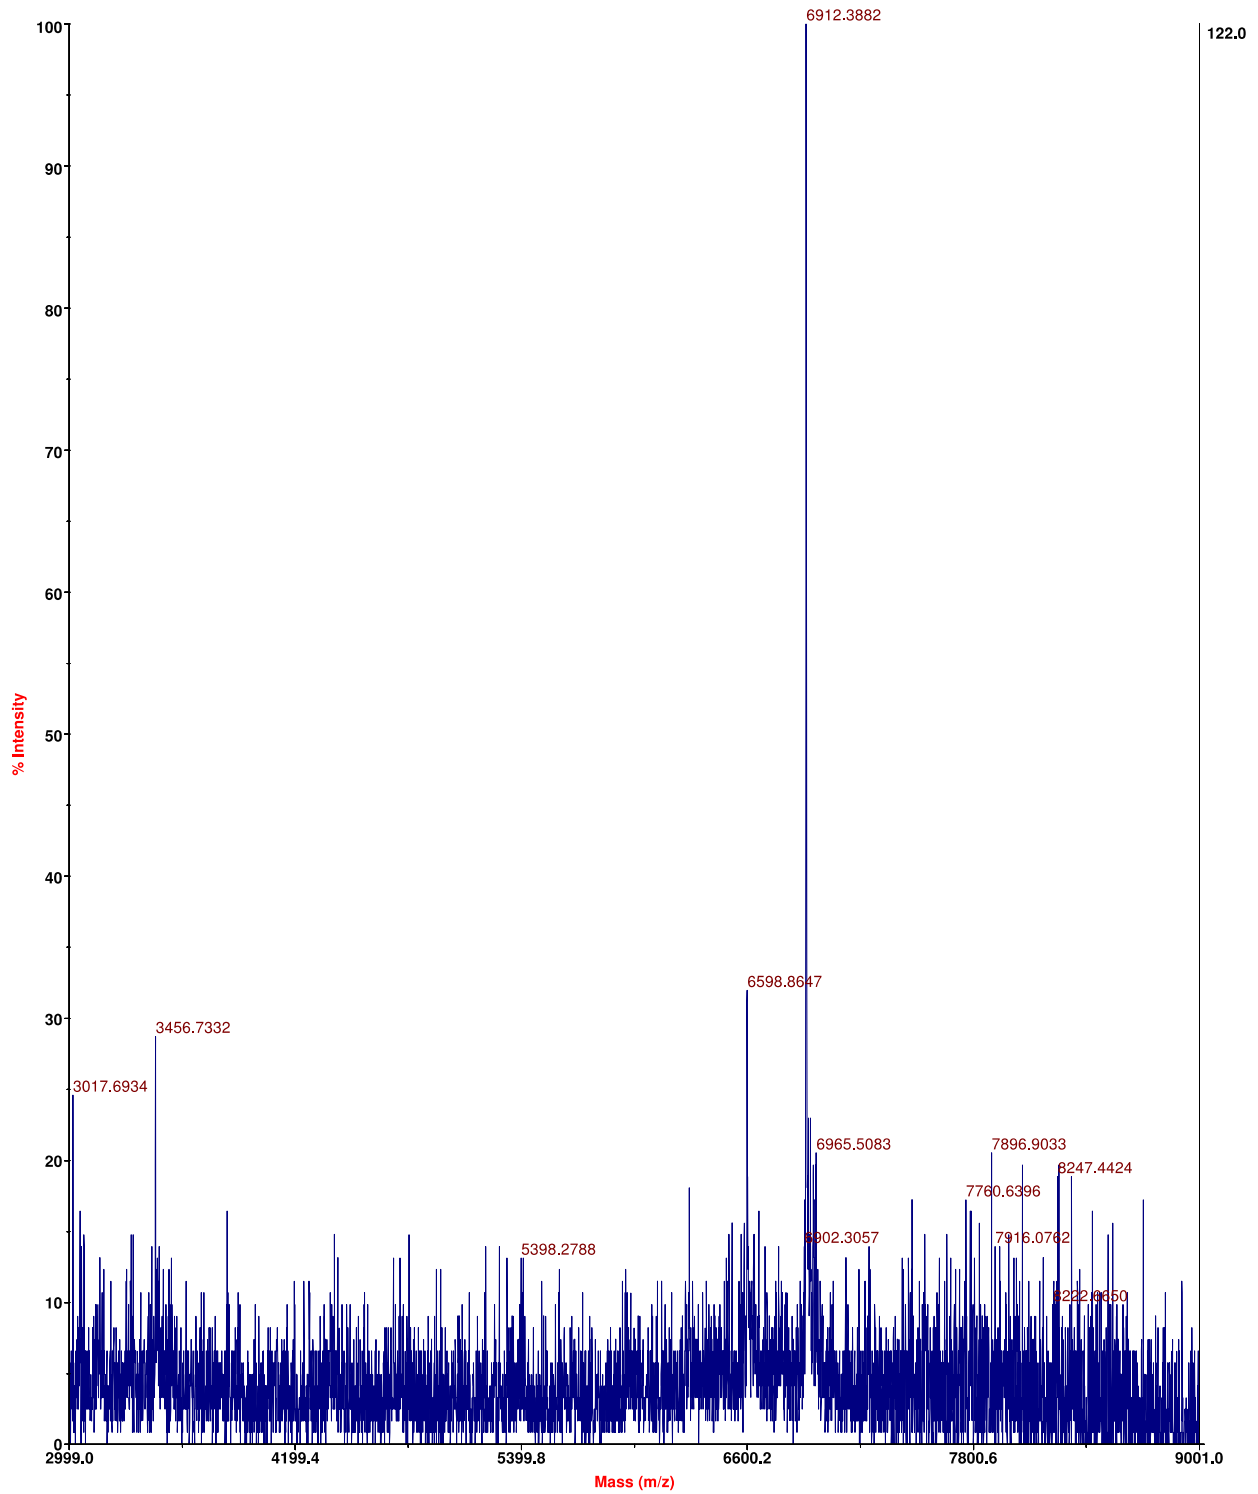

F:\...13'-Cholesterol-20mer.dat  
Acquired:

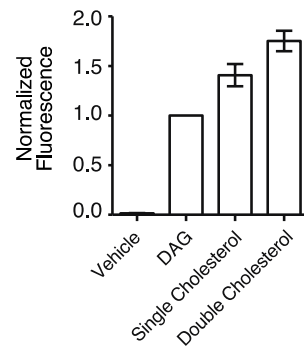

**Figure S1. Labeling of Jurkats with single and double cholesterol anchors.**

Single cholesterol indicates cells a single anchor strand linked to cholesterol (Anch-Chol) alone. Double cholesterol indicates cells labeled with Anch-Chol and a co-anchor modified with cholesterol (cA-Chol) with a 20 bp duplex. Fluorescence was normalized to DAG. Error bars are standard deviations of at least 3 independent measurements.

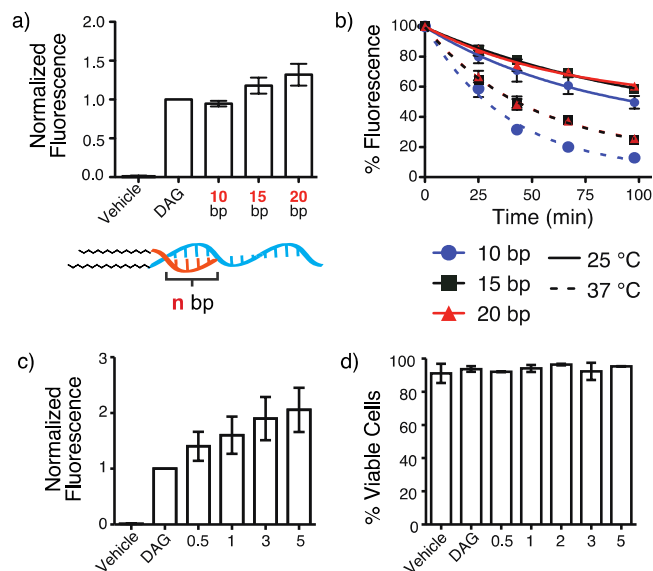

**Figure S2: Cell labeling Optimization.**

The combination of FAs used for this experiment was 5'-Anch<sub>100</sub>-C<sub>18</sub> and 3'-cA-C<sub>16</sub>. a) Dependence of initial cell labeling on the length of duplex formed by the anchor and co-anchor. b) Stability of cell labeling overtime at 25 and 37 °C as a function of duplex length. c) Initial cell labeling as a function of FA-DNA concentration. d) Effect of FA-DNA concentration on cell viability. Error bars are standard deviations of at least 3 independent measurements.

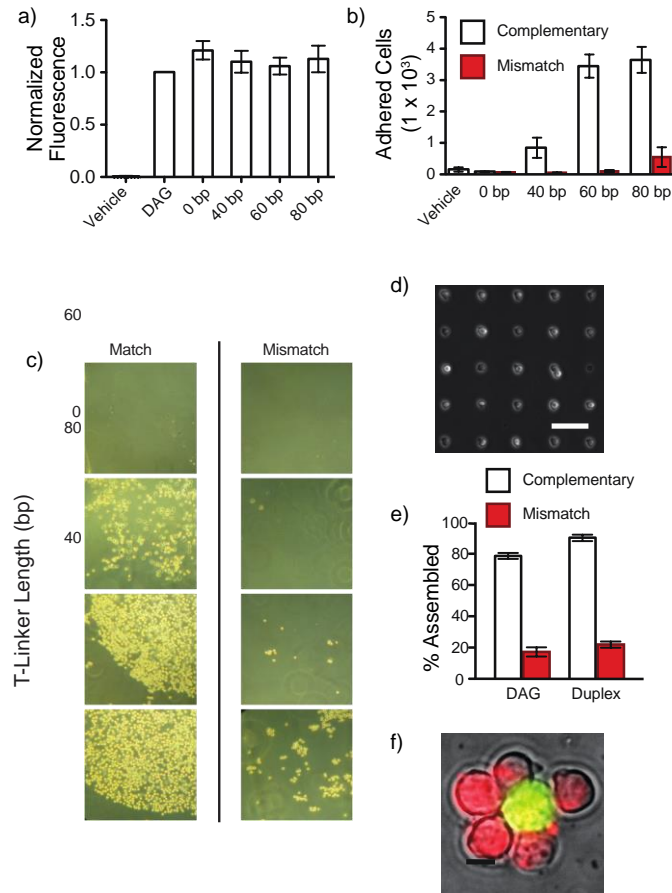

**Figure S3: Binding of cells bearing Anch and cA ssDNA duplexes to cells and surfaces bearing complementary oligonucleotide sequences.** a) Labeling efficiency of various poly-T linker lengths on the anch strand. b,c) Model cell line, Jurkats, labeled with DNA complexes bearing poly-T linker lengths of increasing length were incubated with aldehyde glass modified with spots of complementary or non-complementary ssDNA (scale bar = 100  $\mu\text{m}$ ) and the number of adhered cells was quantified. d) An array of Jurkat cells prepared from printed DNA spots approximately 1 cell in diameter (scale bar is 100  $\mu\text{m}$ ). e) Assembly of Jurkats into small clusters when labeled with complementary and non-complementary DNA strands. f) Representative image of one such cluster. Error bars are standard deviations of at least 3 independent measurements.

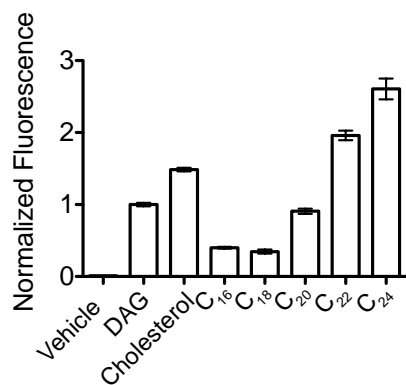

**Figure S4. The effect of FA-Anch length on cell surface DNA retention after 90 minutes at 37 °C.**

The Anch strand was linked to saturated fatty acids of increasing length and fluorescence was measured after a 90 minute time course and normalized to DAG which was arbitrarily set to 1. The cA strand was linked to 3'-CA<sub>20</sub>-C<sub>16</sub> fatty acid for all samples. Error bars are standard deviations of at least 3 independent measurements.



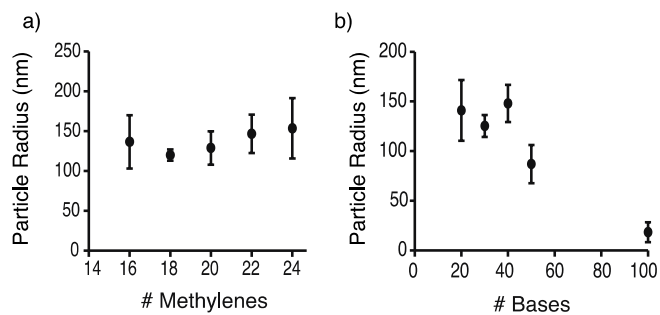

**Figure S5. Particle size by DLS of 3'-cA strands of with various hydrophobicities and charges.**

a) Particle size gradually increases as the hydrophobicity of the linked fatty acid increases for 3'-cA<sub>20</sub>. Particle size drops for 3'-cA-C<sub>24</sub> as more nucleotides are added thus increasing the charge. Error bars are standard deviations of at least 3 independent measurements.

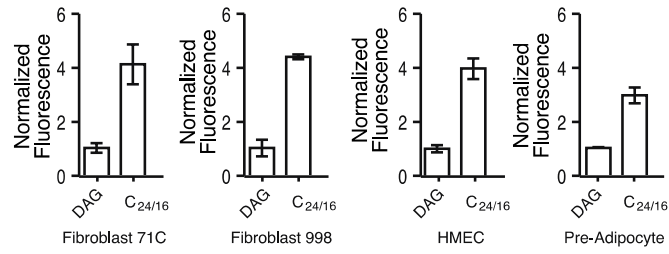

**Figure S6. Cell Labeling of Several Primary Cell Lines**

Cells were labeled with either DAG or a combination of 5<sup>1</sup>-Anch<sub>100</sub>-C<sub>24</sub>/3<sup>1</sup>-cA<sub>50</sub>-C<sub>24</sub> and the relative fluorescence was plotted. Error bars are standard deviations of at least 3 independent measurements.

## References

1. Research, G. 5'-MMT-Amino-Modifiers. *Technical Note* 1–2 (2013).
2. Selden, N. S. *et al.* Chemically Programmed Cell Adhesion with Membrane-Anchored Oligonucleotides. *J. Am. Chem. Soc.* **134**, 765–768 (2012).
3. Debnath, J., Muthuswamy, S. K. & Brugge, J. S. Morphogenesis and oncogenesis of MCF-10A mammary epithelial acini grown in three-dimensional basement membrane cultures. *Methods* **30**, 256–268 (2003).
4. Limberg, R., Rumlung, R. & Resch, M. An optimised sample preparation for the MALDI- ToF-MS of oligonucleotides. *Technical Note* 1–4 (1998).
